# Supplementary material for: In Search of an Uncultured Human-Associated TM7 Bacterium in the Environment
Source: PubMed Central journal article supplement (PMC3118805; doi:10.1371/journal.pone.0021280), 2011-06-20

TM7a Group

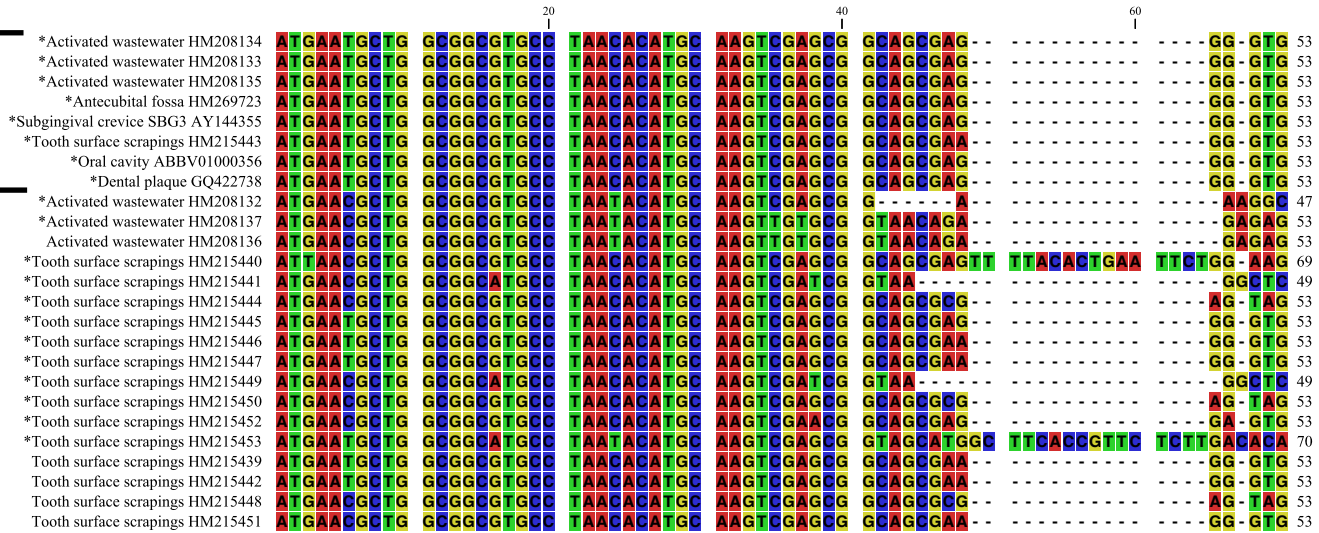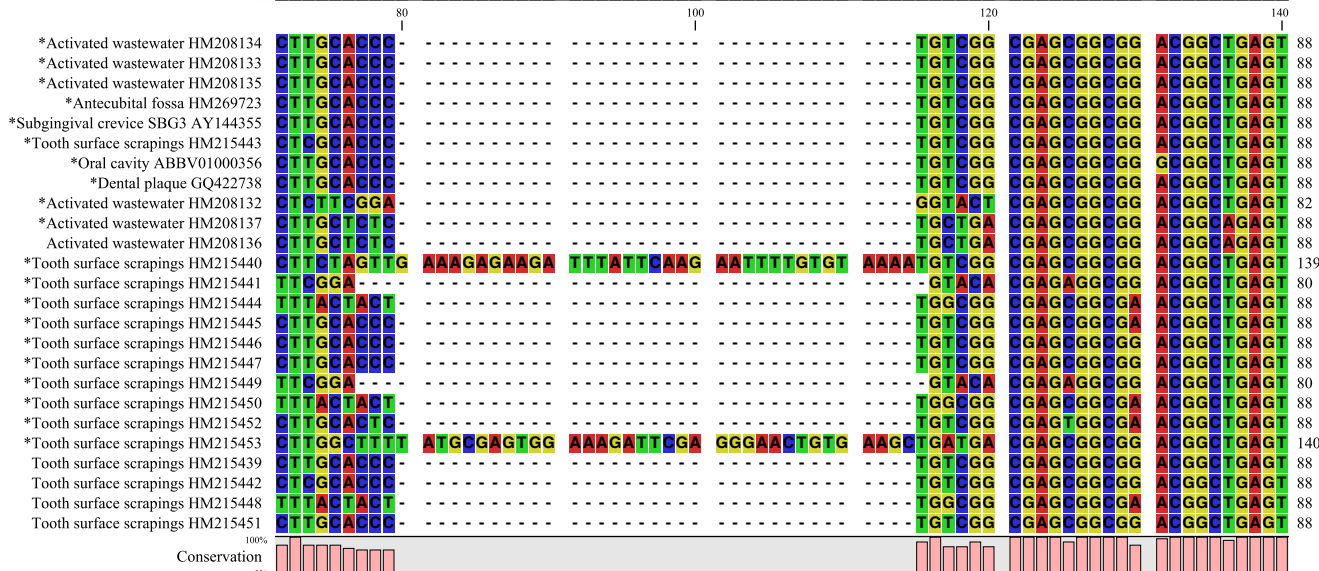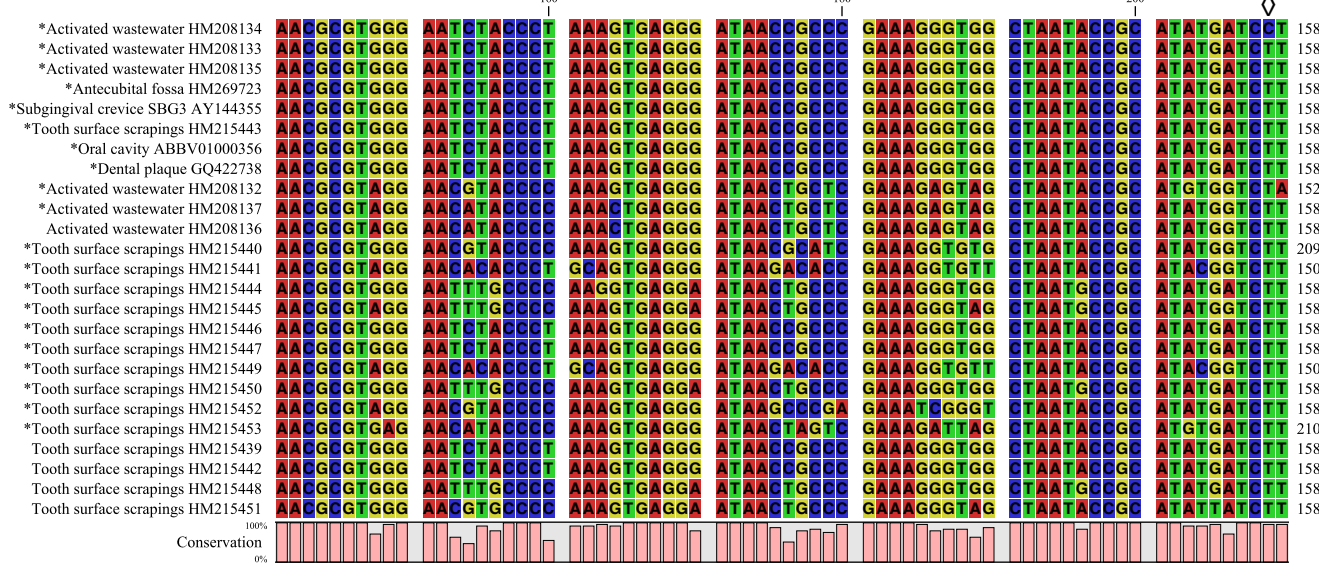

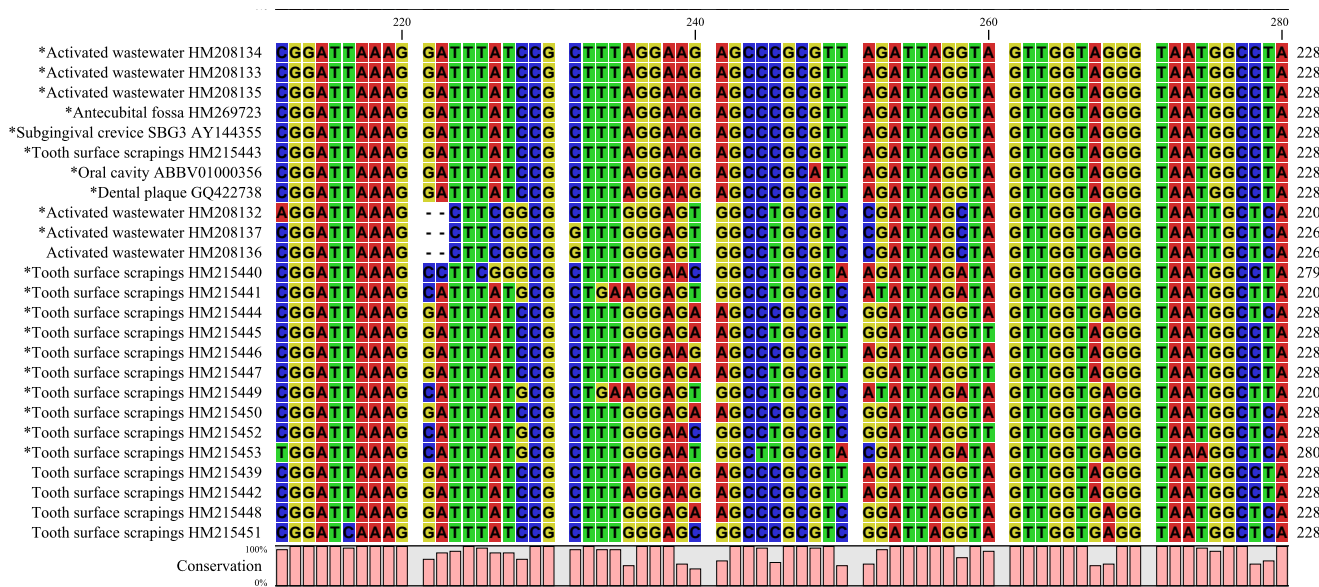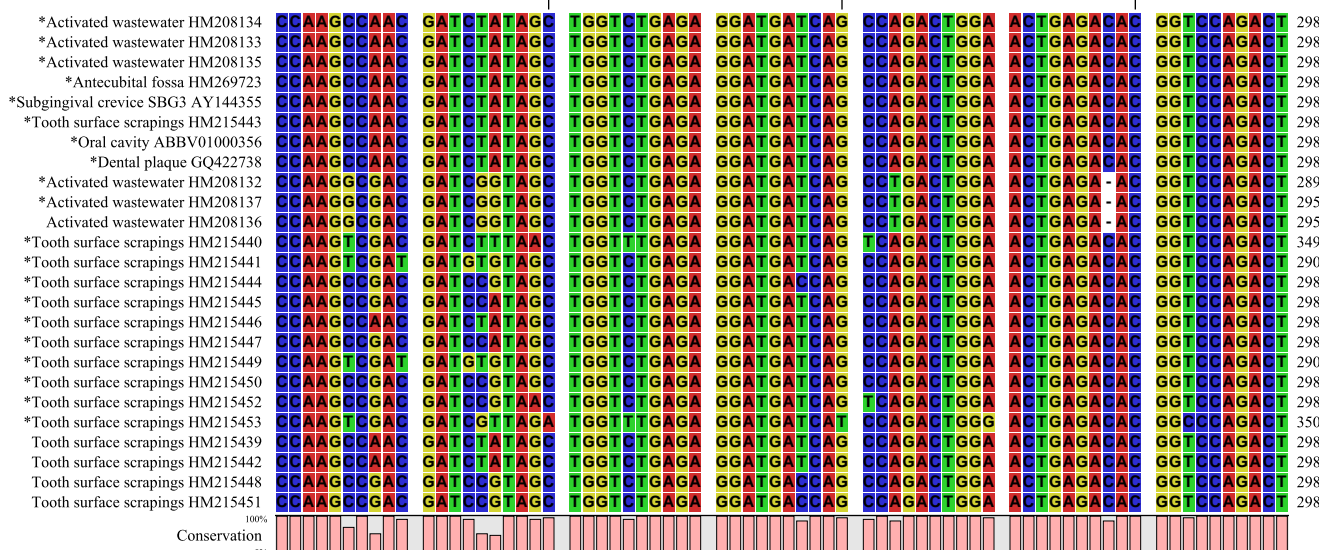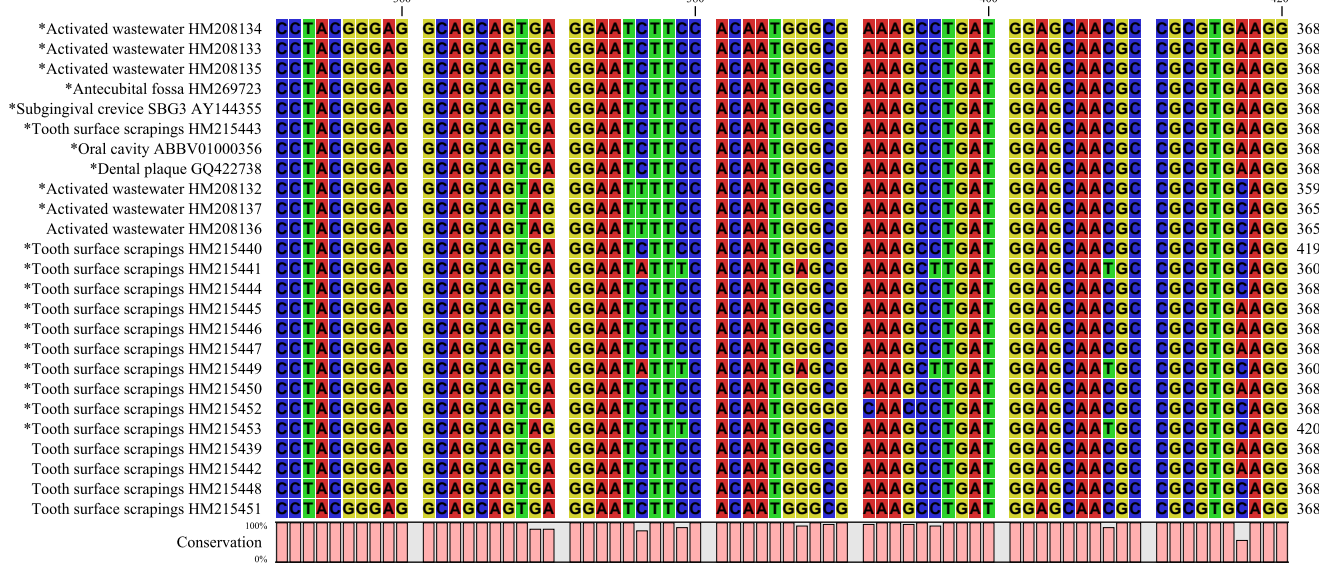

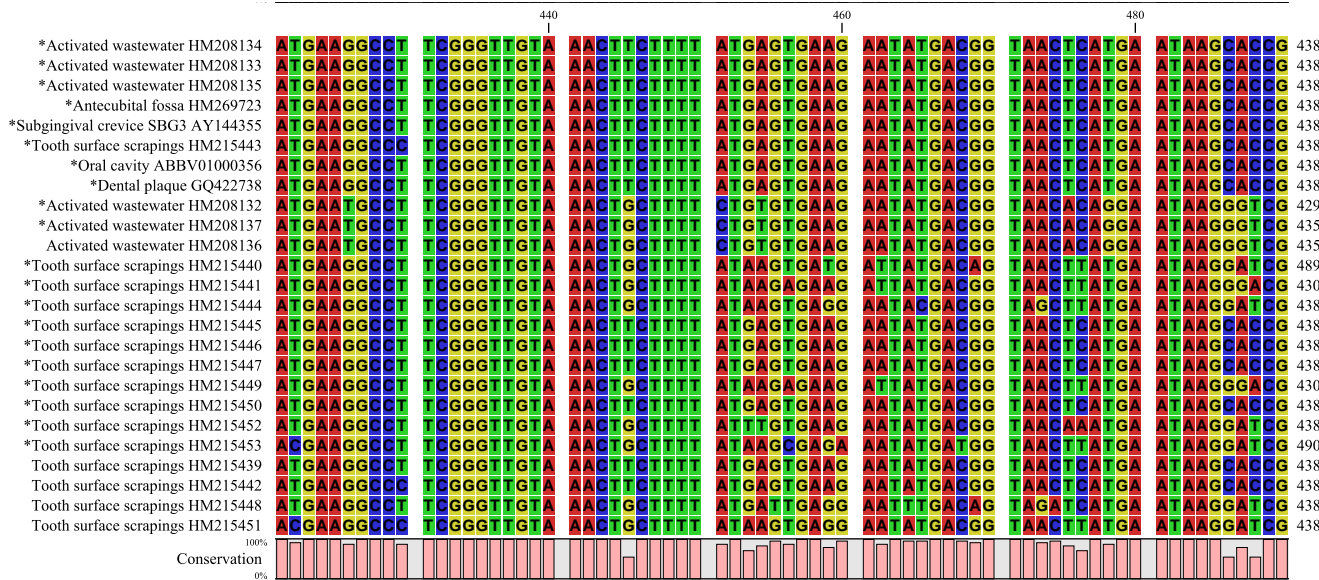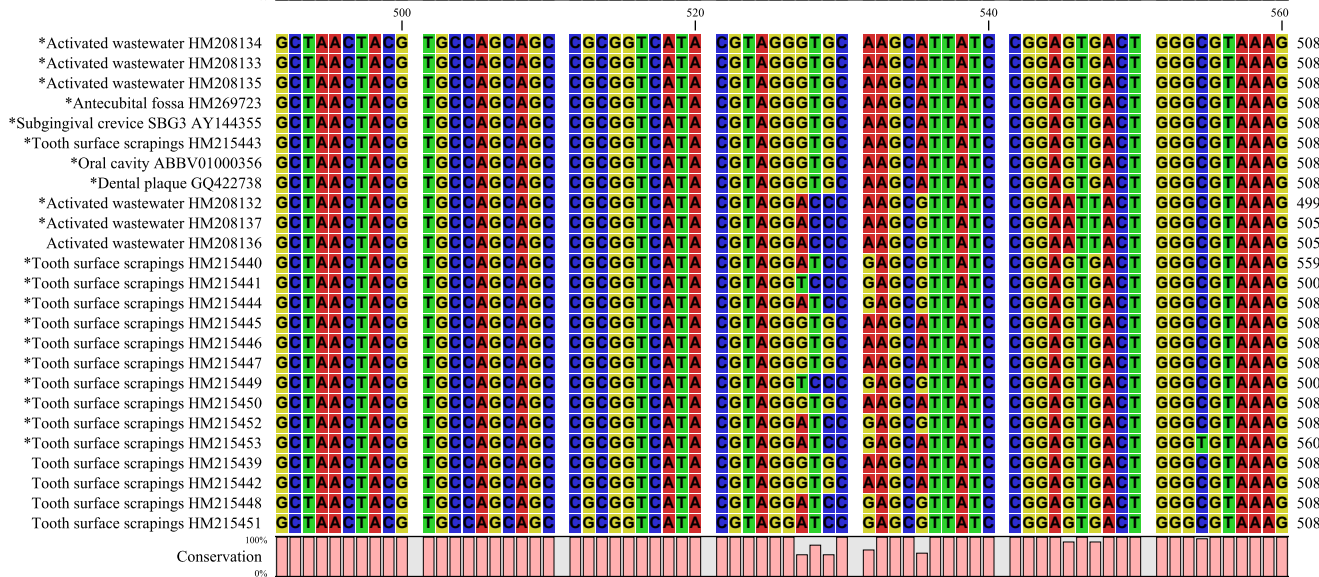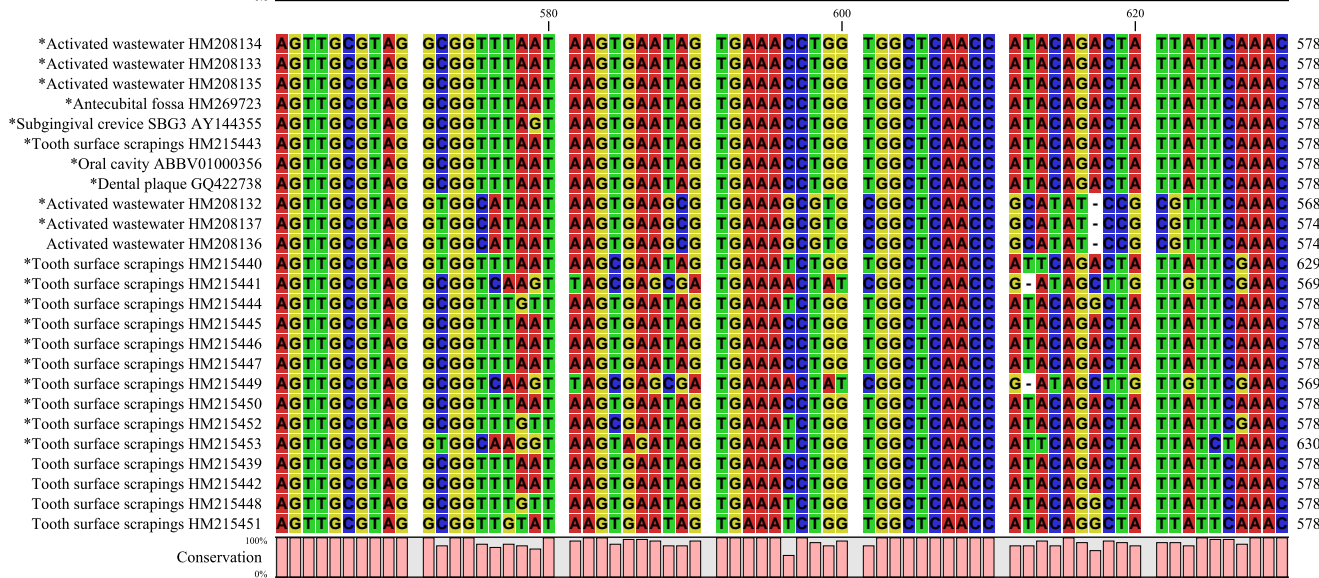

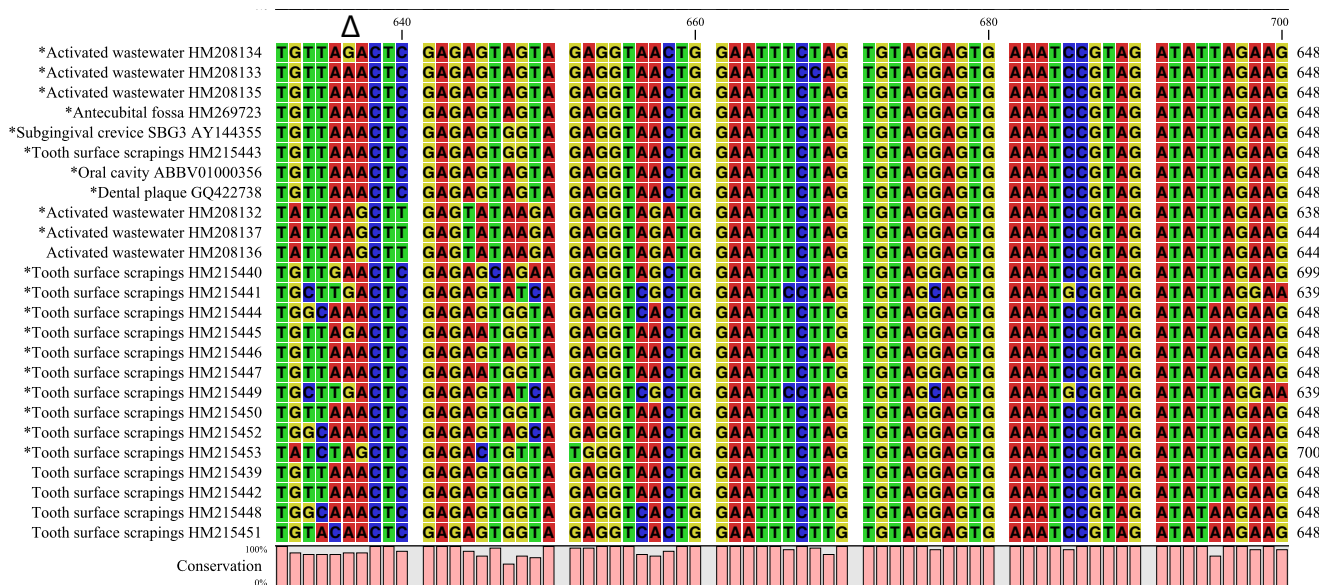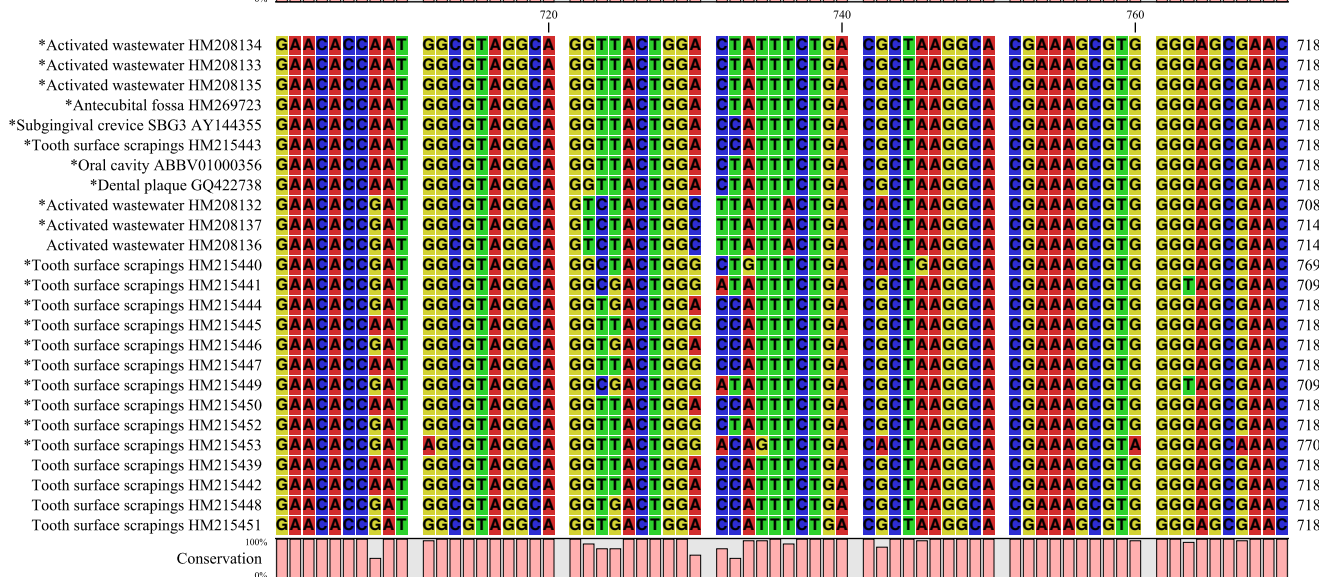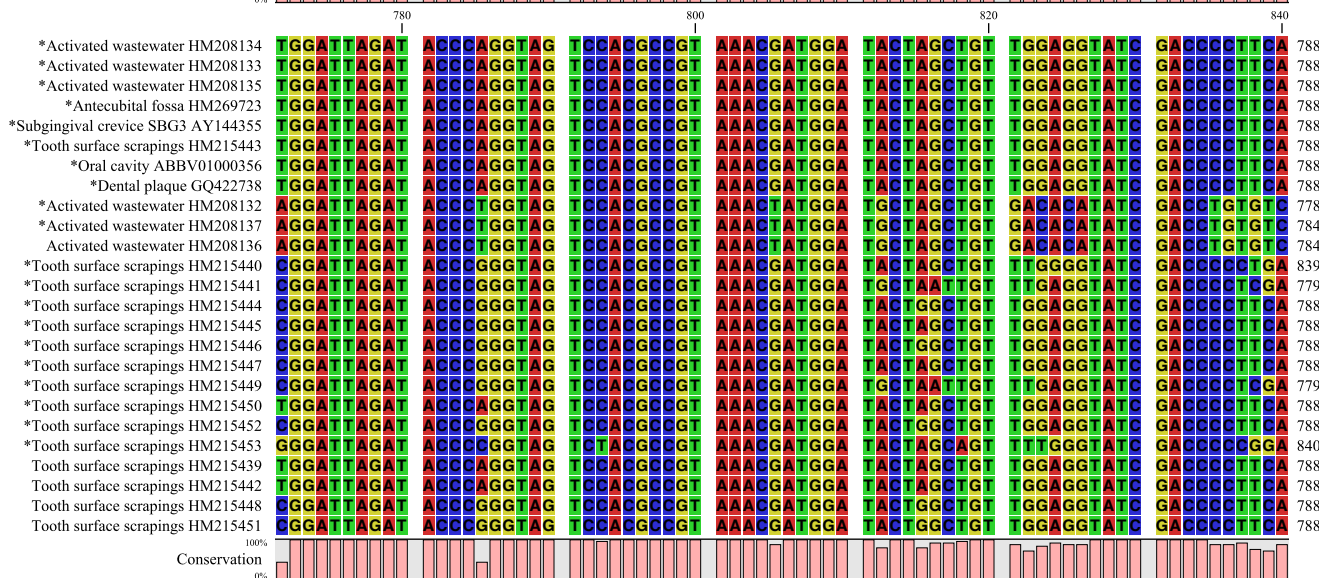

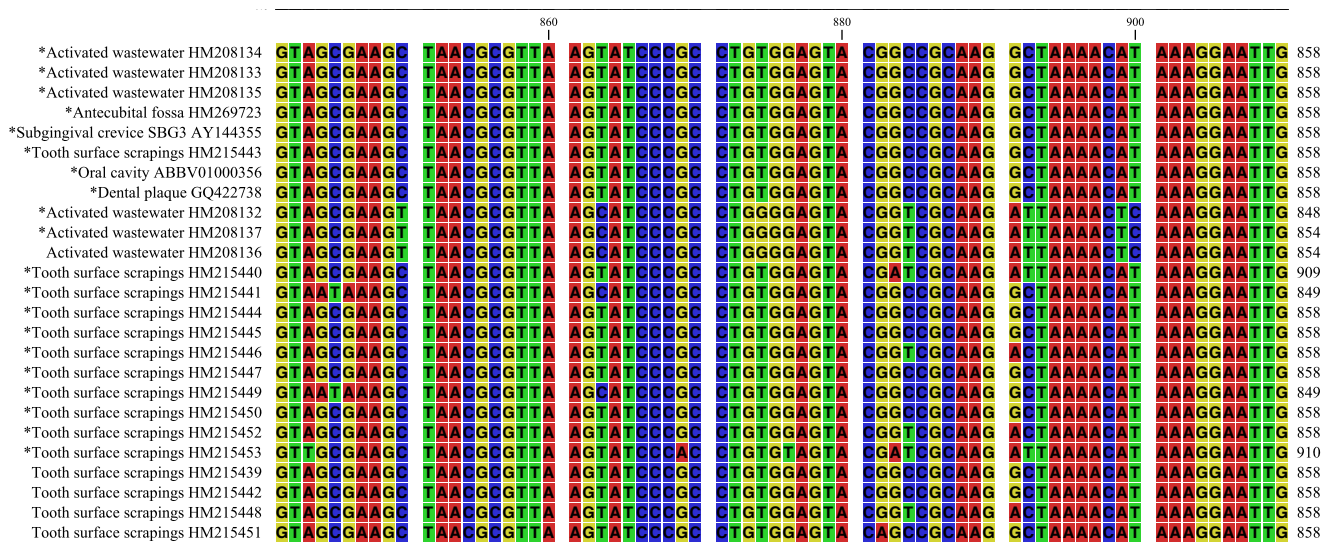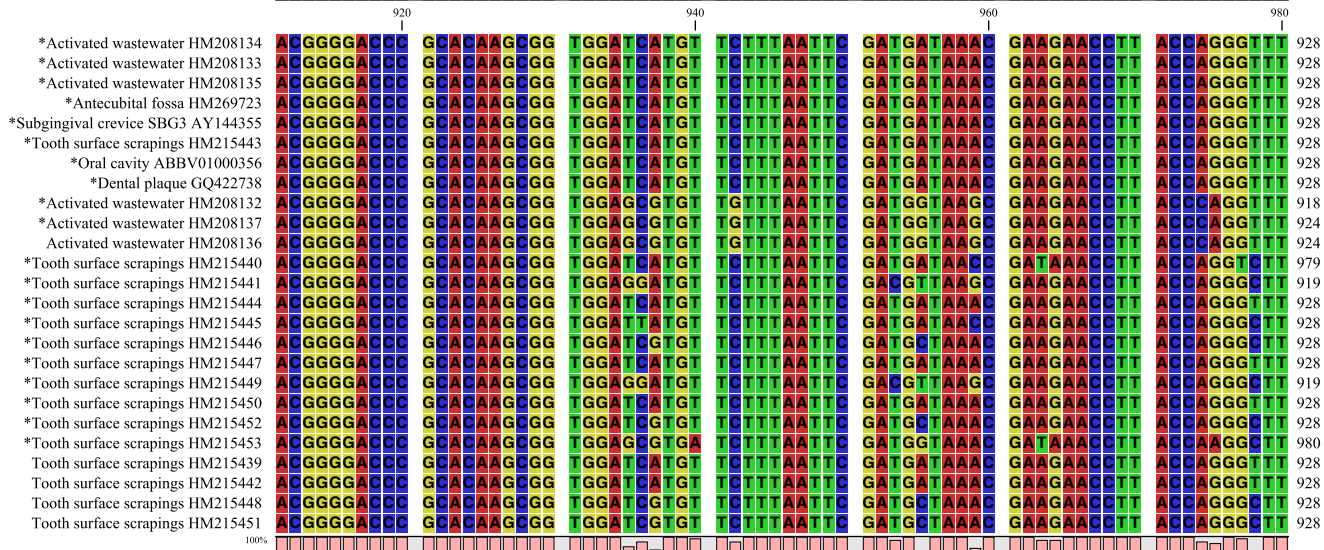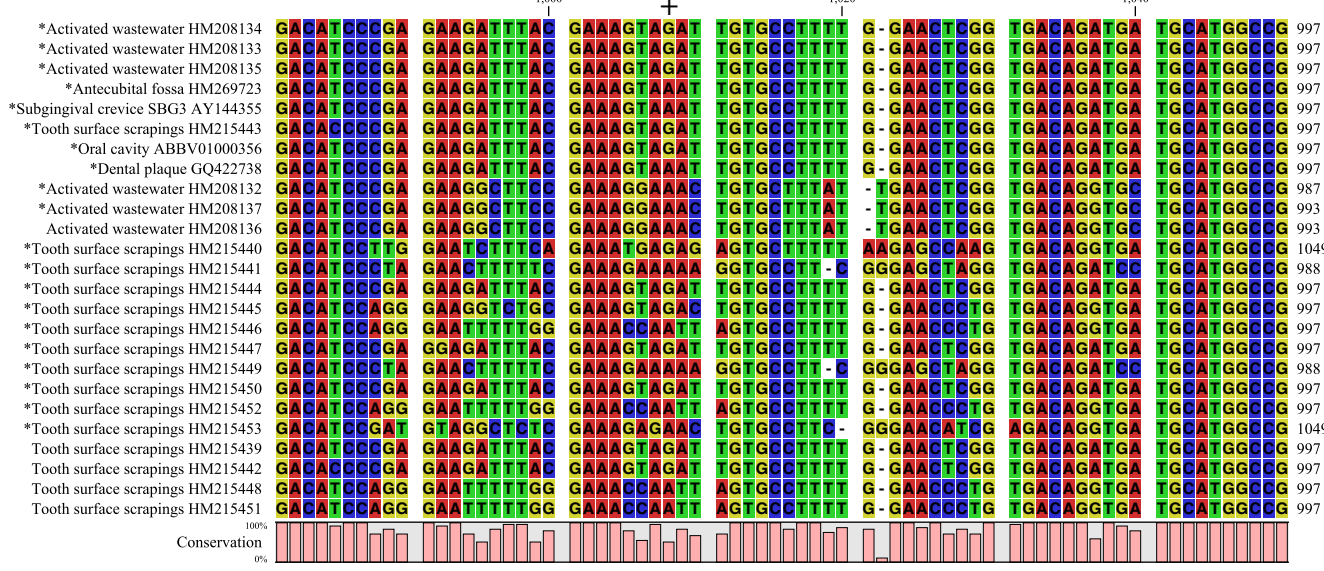

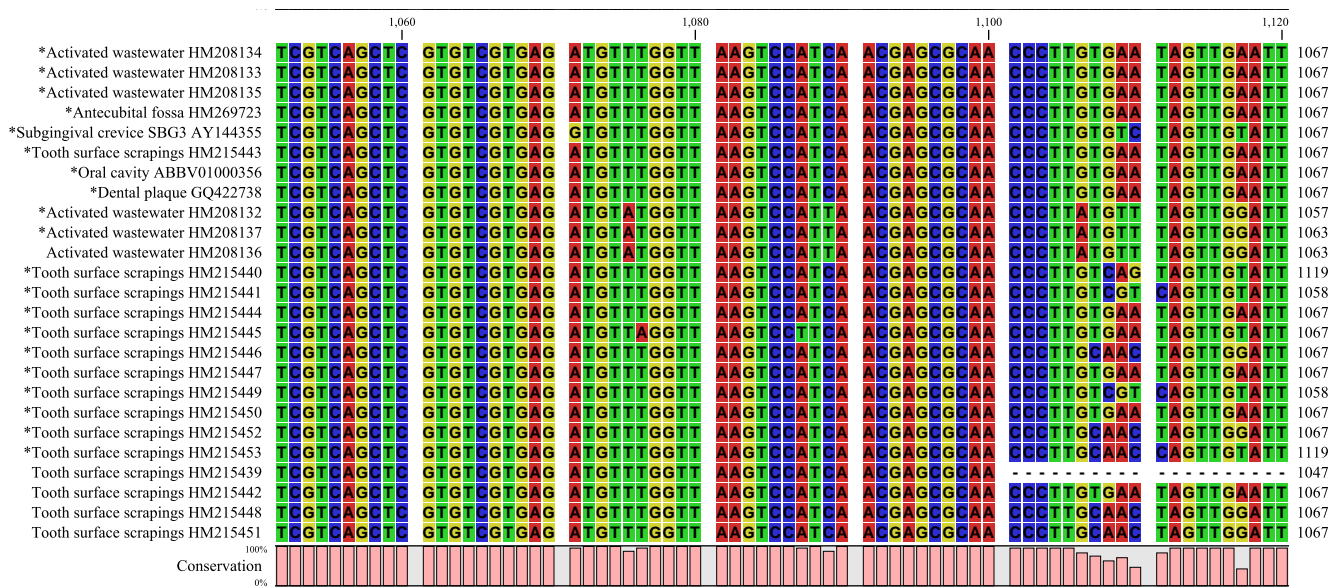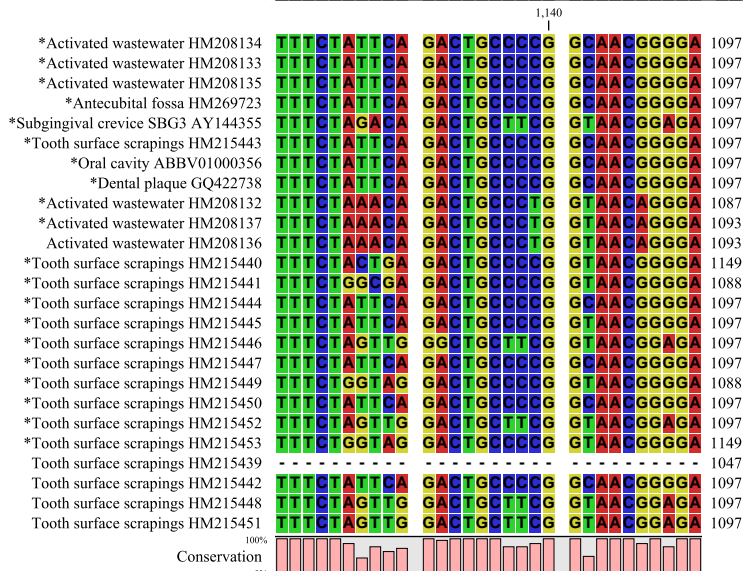

Supplement: pone.0021280.s003.pdf [file pone.0021280.s003.pdf]
